# Supplementary material for: Autologous genome-edited hematopoietic stem cells correct Gaucher disease and establish a platform for clinical translation
Source: Research Square preprint supplement (doi:10.21203/rs.3.rs-7123212/v1), 2025-08-18
Supplement: Supplementary file 2 [file d99325f9d1ff11f2becfd2d4.pdf]

# **Autologous genome-edited hematopoietic stem cells correct Gaucher disease and establish a platform for clinical translation**

## **Author list**

Luisa Pimentel Vera<sup>1</sup>, Marc Gastou<sup>2</sup>, Pasqualina Colella<sup>1</sup>, Jessica Arozqueta Basurto<sup>1,3</sup>, Allan Feng<sup>1</sup>, Yi Lin<sup>4</sup>, Xueheng Zhao<sup>5,6</sup>, Ying Sun<sup>4,6</sup>, Natalia Gomez-Ospina<sup>1,3\*</sup>

## **Extended Data**

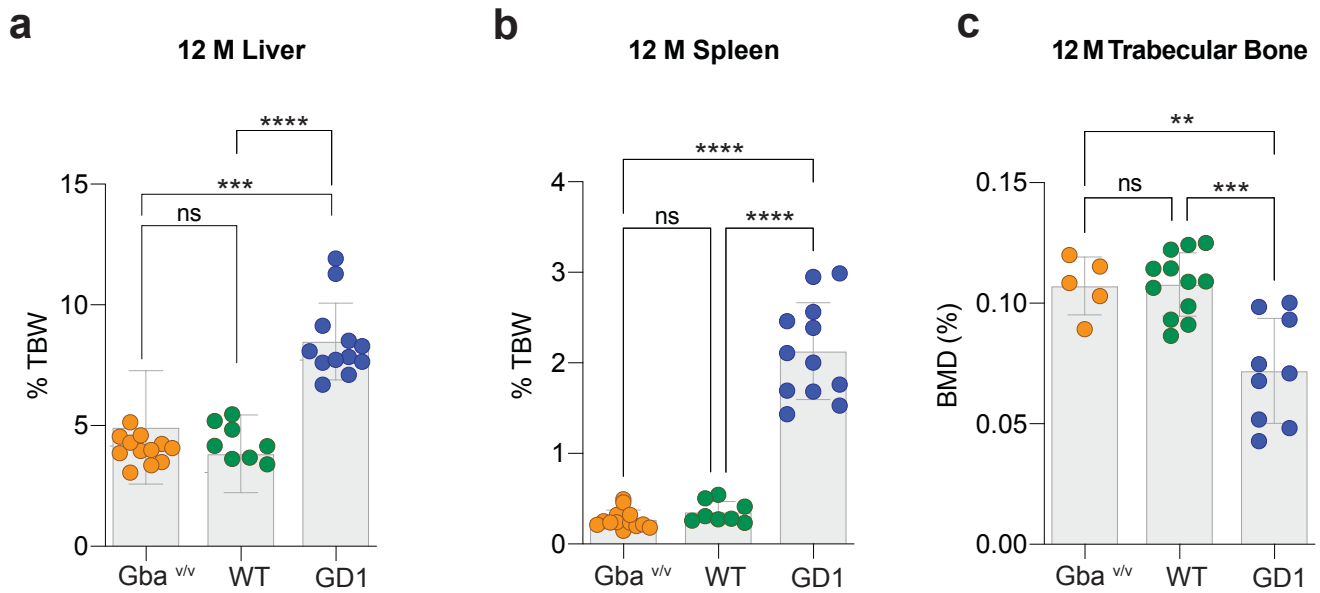

**Extended Data Figure 1. Comparison of hematologic and visceral parameters in wildtype, D427V knock-in, and GD1 mice at 12 months**

**a, and b,** Spleen and liver weights as a percentage of total body weight for 12-month-old mice (Gba<sup>v/v</sup> n=13, GD1 n=12, and WT n=11). **c,** Trabecular bone mineral density in distal femurs at 12 months (Gba<sup>v/v</sup> n=12 and GD1 n=8). Data are shown as mean ± SD. Statistical analysis was performed using one-way ANOVA with Dunnett's multiple comparison test. Significance levels indicated as \*\*p < 0.01, \*\*\*p < 0.001, and \*\*\*\*p < 0.0001.

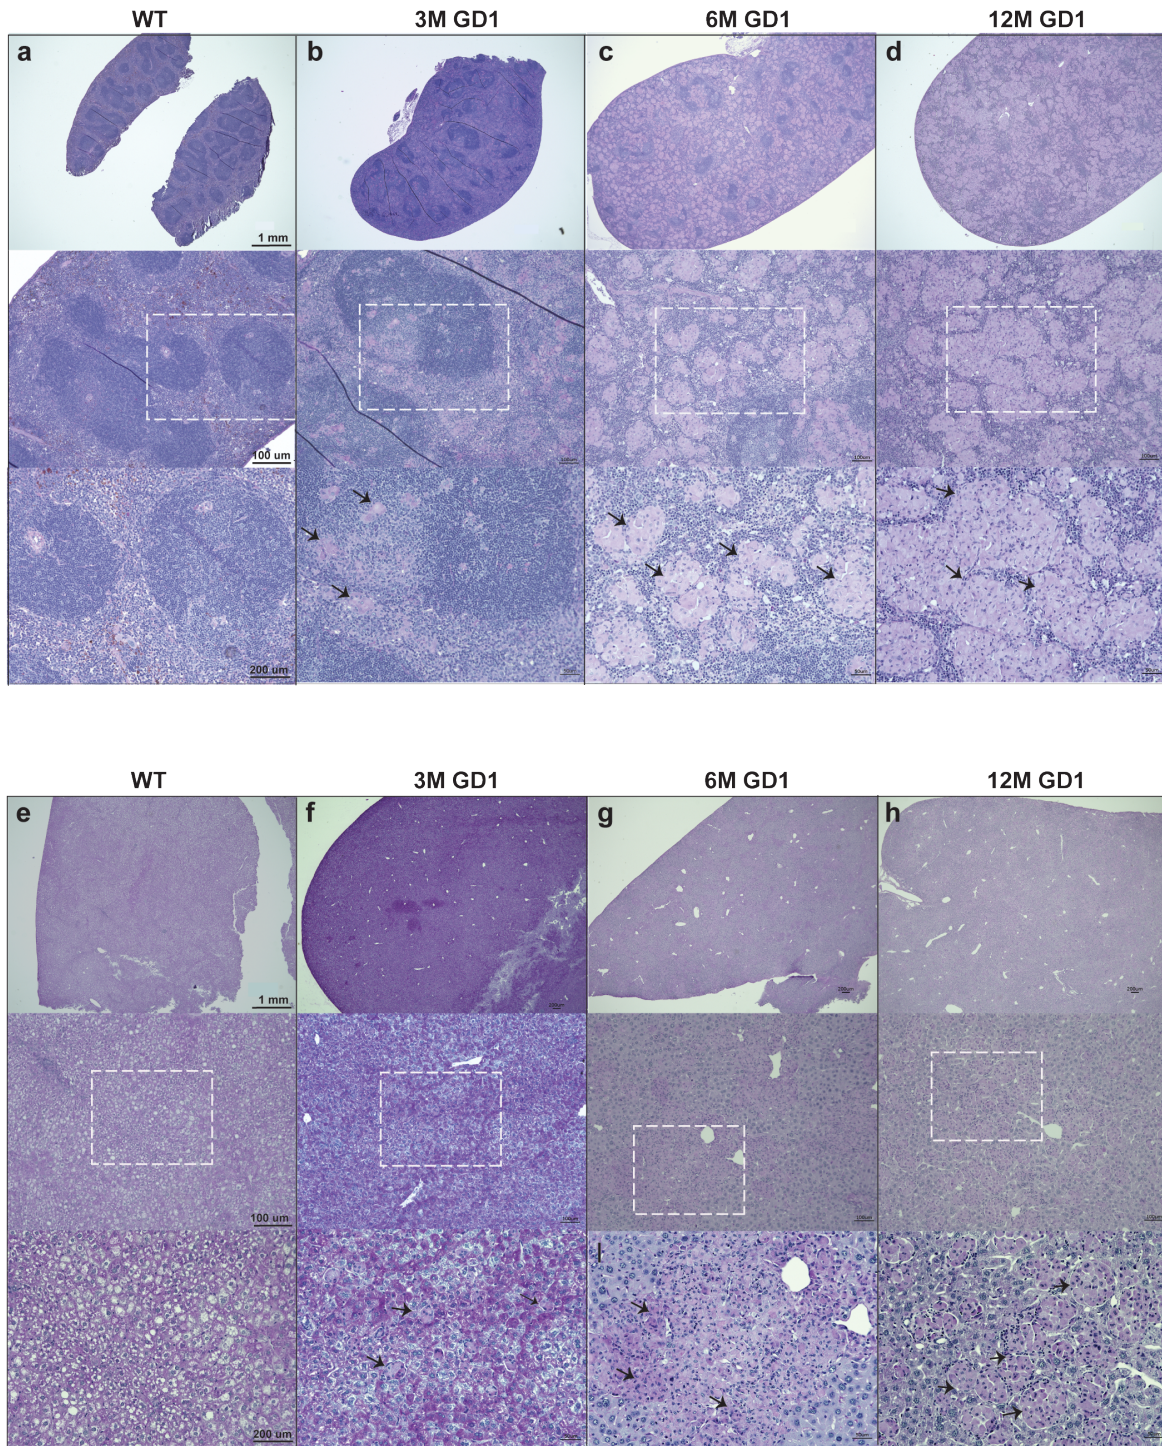

**Extended Data Figure 2. Gaucher cells infiltrate the spleen and liver following the conditional deletion of *Gba1* exons 6-8.**

Periodic acid-Schiff staining reveals focal collections of classical foamy Gaucher cells (indicated by black arrows) in representative sections of the spleen (**a-d**) and liver (**e-h**) of WT and GD1 mice at 3, 6, and 12 months of age (from left to right). Sections from three different magnifications are presented from top to bottom. Scale bars: 1 mm; 200μm and 100μm. The sections are representative from a total of 5 sections from 3 independent mice per condition.

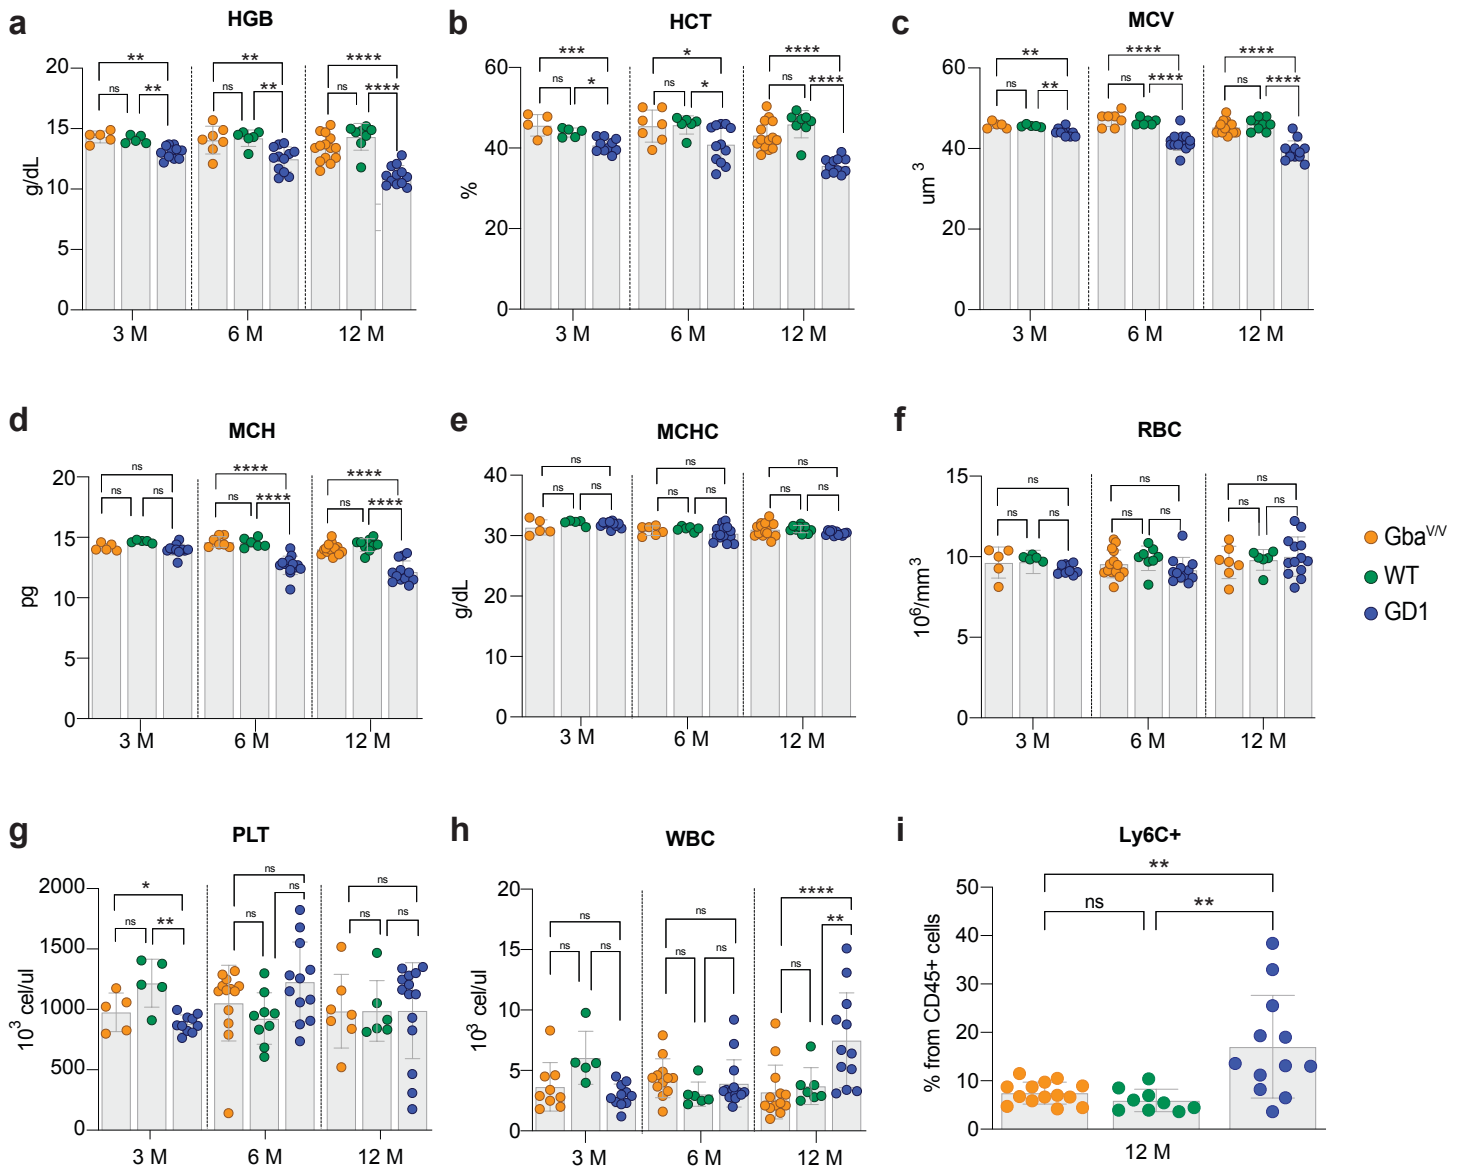

### Extended Data Figure 3. Complete blood cell counts for all *Gba* genotypes at 3, 6, and 12 months.

Data were collected from wild-type mice (*Gba*<sup>+/+</sup>, green, n=5-9), homozygous mice lacking the Cre transgene (*Gba*<sup>f/f</sup>;D427V/D427V, or *Gba*<sup>V/V</sup>, yellow, n=5-14), and plpC-injected homozygous mice carrying the Cre transgene (*Gba*<sup>f/f</sup>;D427V/D427V-Tg(Mx1-CRE), or GD1, blue, n=9-14) at 3, 6, and 12 months of age. **a**, Hemoglobin (HGB). **b**, Hematocrit (HCT). **c**, Mean red blood cell volume (MCV). **d**, Mean corpuscular hemoglobin (MCH). **e**, Mean corpuscular hemoglobin concentration (MCHC). **f**, Red blood cell (RBC) count. **g**, Platelet count (PLT). **h**, White blood cell (WBC). **i**, Percent Ly6C<sup>+</sup> cells in the peripheral blood of 12-month-old mice for the same genotypes measured by flow cytometry. Data are shown as mean ± SD. Statistical analysis from **a-i** was performed using One-way ANOVA with Sidak's multiple comparison test for the three genotypes in each time point. Significance levels indicated as \*\*p < 0.01, \*\*\*p < 0.001, and \*\*\*\*p < 0.0001.



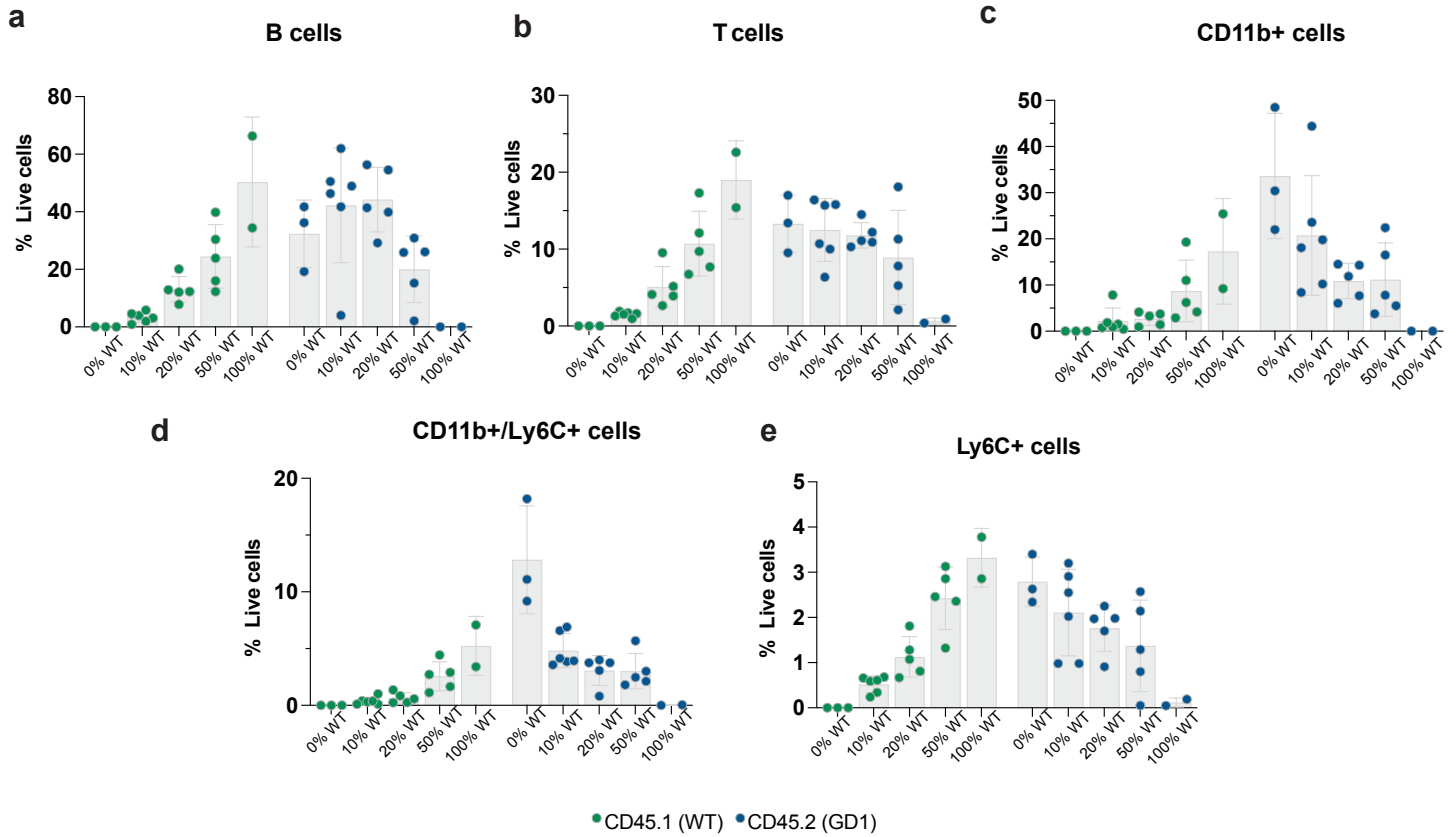

#### Extended Data Figure 4. In vivo multilineage differentiation of WT $Gba^{+/+}$ and GD1 $Gba^{-/-}$ HSCs

Frequency and engraftment of **a**, B cells (CD19+), **b**, T cells (CD3+) and **c-e**, myeloid cells (CD11b+, Ly6C+) in peripheral blood twenty weeks post-transplantation. Each dot represents data from one mouse. Data are shown as mean  $\pm$  SD.

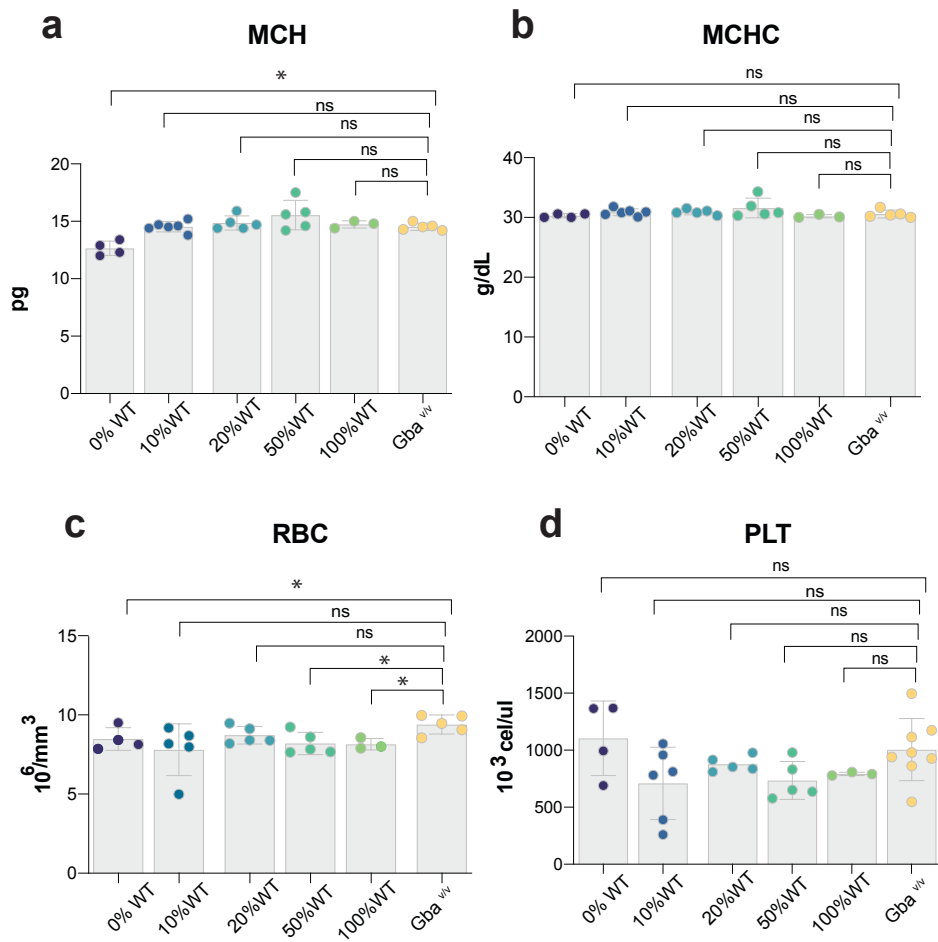

**Extended Data Figure 5. Complete blood cell counts in GD1 mice with mixed grafts containing 0%, 10%, 20%, 50%, or 100% WT cells.**

**a**, Mean corpuscular hemoglobin (MCH). **b**, Mean corpuscular hemoglobin concentration (MCHC); **c**, red blood cell (RBC) count. **d**, Platelet count (PLT). All data are presented as mean  $\pm$  SD. Statistical analysis for **a** was performed using two-way ANOVA with Sidak's multiple comparisons test; for **b**, **c**, and **d**, one-way ANOVA with Dunnett's multiple comparison test. Significant differences are indicated by asterisks (\* $p < 0.05$ ; \*\* $p < 0.01$ ; \*\*\* $p < 0.001$ ; \*\*\*\* $p < 0.0001$ ).

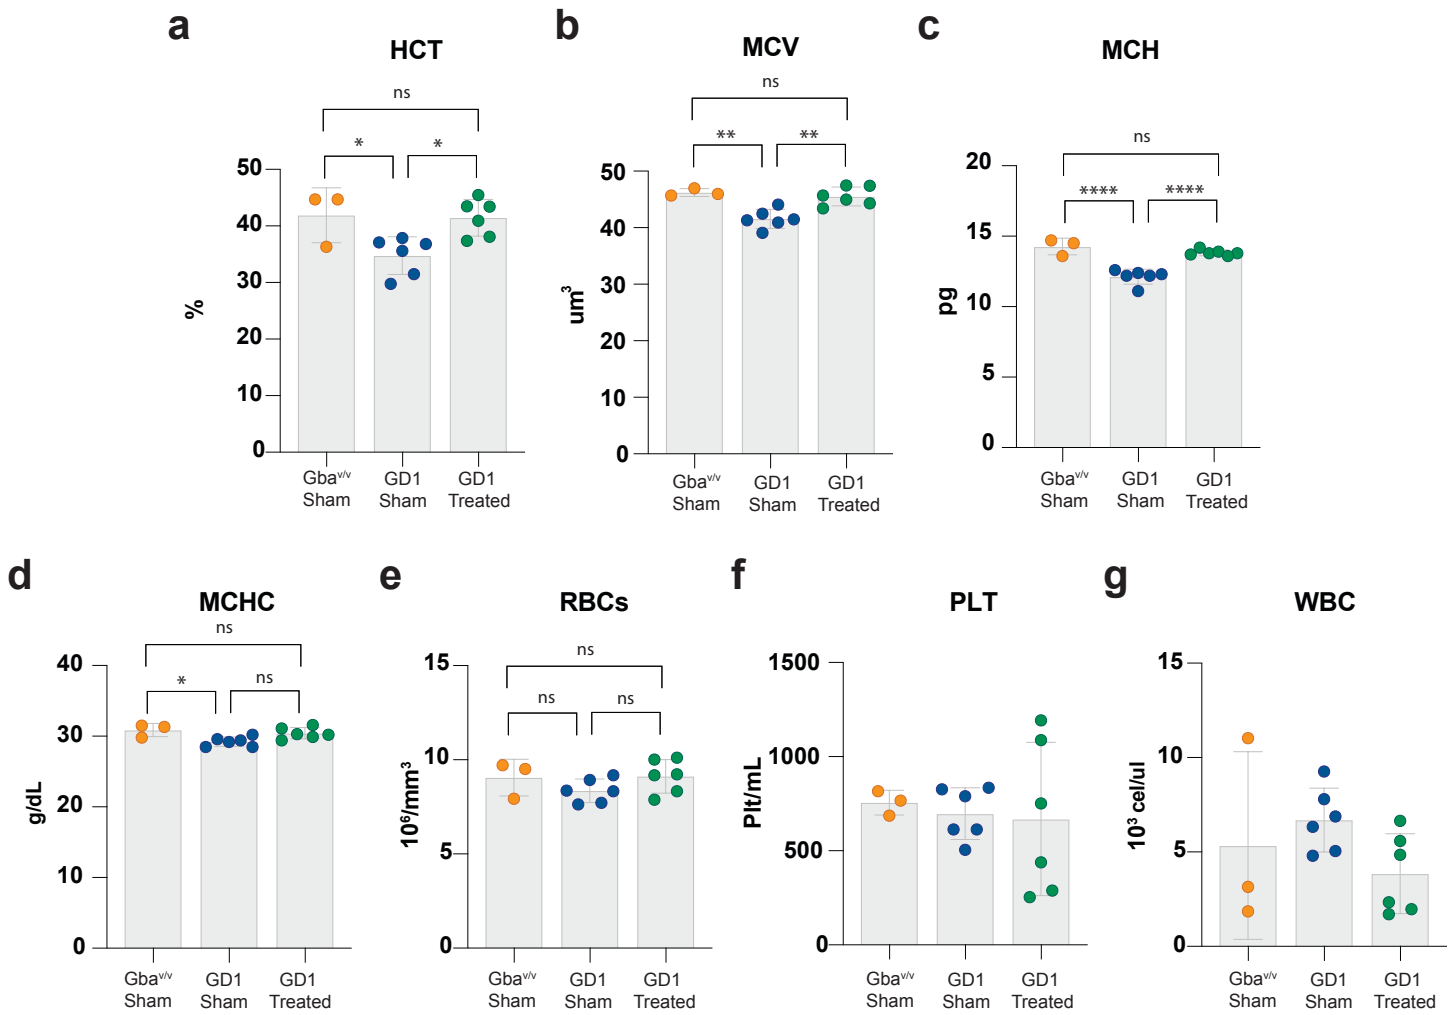

**Extended Data Figure 6. Additional hematologic parameters in TBI-conditioned GD1 mice transplanted with genome edited HSPCs.**

**a**, Hematocrit. **b**, Mean red blood cell volumes. **c**, Mean corpuscular hemoglobin (MCH). **d**, Mean corpuscular hemoglobin concentration (MCHC). **e**, Red blood cell (RBC) count. **f**, Platelet count; and **g**, White blood cell (WBC) count measured in blood. Data were collected from Sham Gba<sup>w/v</sup> (n = 3), Sham-GD1 (n = 6), and Treated-GD1 (n = 6) mice. All data are presented as mean ± SD. Statistical analysis was one-way ANOVA with Tukey multiple comparison test. Significant differences are indicated by asterisks (\*p < 0.05; \*\*p < 0.01; \*\*\*p < 0.001; and \*\*\*\*p < 0.0001).

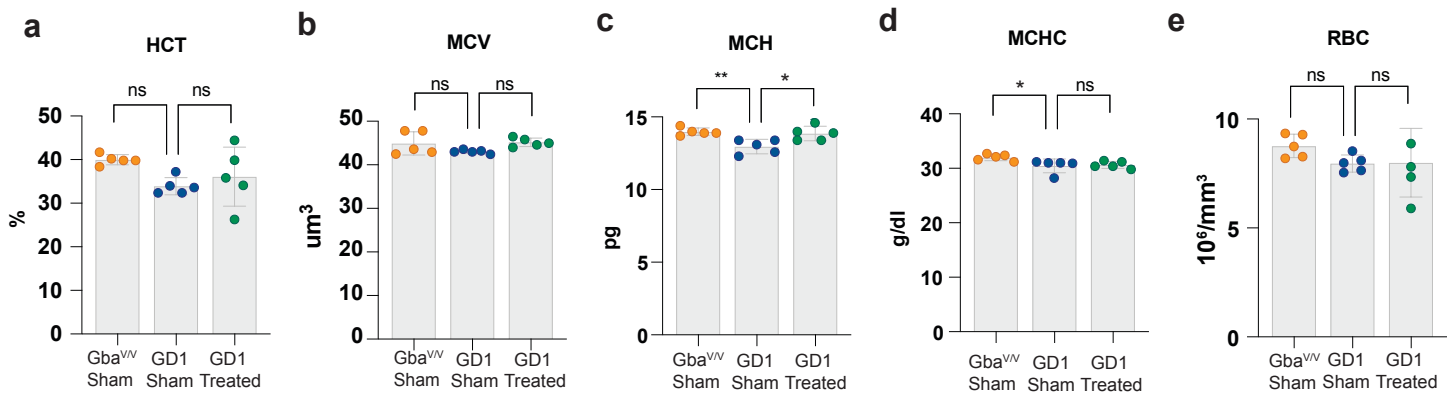

**Extended Data Figure 7. Additional hematologic parameters in Busulfan-condition GD1 mice transplanted with genome edited HSPCs.**

**a**, Hematocrit. **b**, Mean red blood cell volumes. **c**, Mean corpuscular hemoglobin (MCH). **d**, Mean corpuscular hemoglobin concentration (MCHC). **e**, Red blood cell (RBC) count. Data were collected from Sham Gba<sup>V/V</sup> (n = 5), Sham-GD1 (n = 5), and Treated-GD1 (n = 5) mice. All data are presented as mean  $\pm$  SD. Statistical analysis was one-way ANOVA with Tukey multiple comparison test. Significant differences are indicated by asterisks (\*p < 0.05; \*\*p < 0.01; \*\*\*p < 0.001; and \*\*\*\*p < 0.0001).

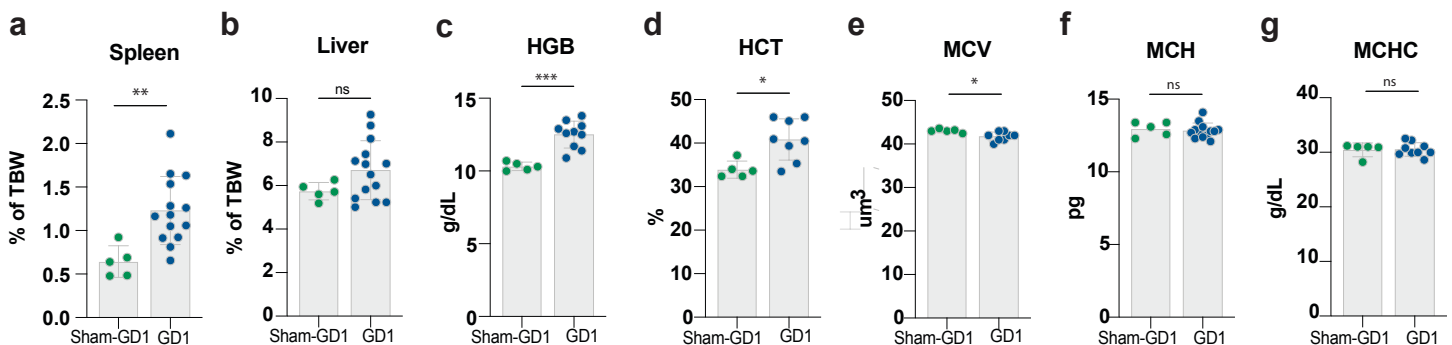

**Extended Data Figure 8. Hematologic and organ size parameters in GD1-Sham mice following Busulfan conditioning compared to age-matched unmanipulated GD1 mice.**

**a**. Spleen weight. **b**. Liver weight. **c**. Hemoglobin (HGB). **d**. Hematocrit (HCT). **e**. Mean corpuscular volume (MCV). **f**. Mean corpuscular hemoglobin (MCH). **g**. Mean corpuscular hemoglobin concentration (MCHC). Comparisons were made between Sham-GD1 mice (busulfan-conditioned GD1 mice transplanted with GD1 cells) and age-matched untreated GD1 mice. Data are presented as mean  $\pm$  SD; individual values are shown as dots. Statistical significance was determined using unpaired t-tests.



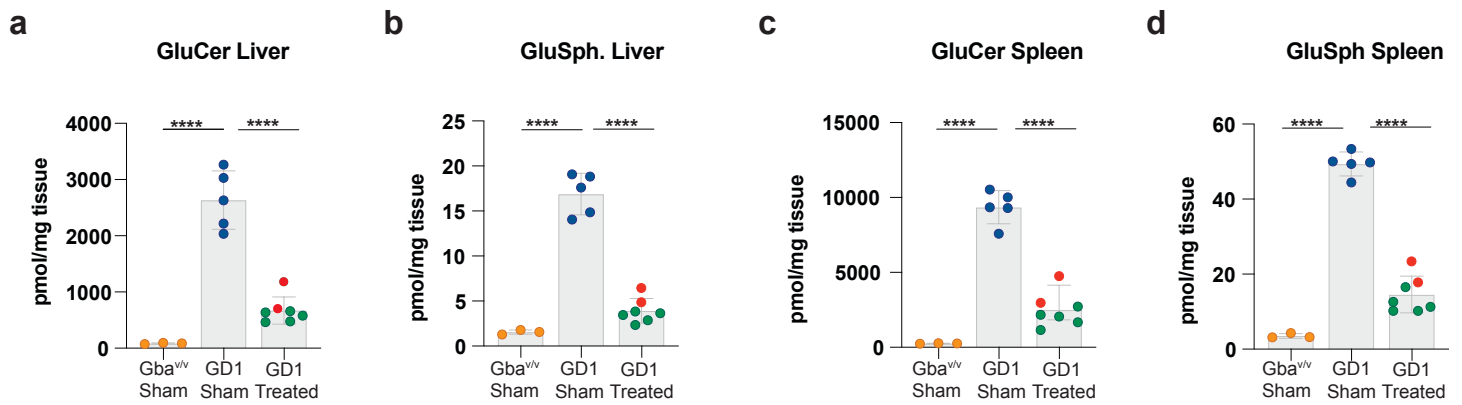

**Supplementary Figure 9. Tissue reduction of glucosylceramide and glucosylsphingosine in treated GD1 mice, including those with low edited cell engraftment.**

Levels of glucosylceramide (GluCer) and glucosylsphingosine (GluSph) in the liver (**a–b**) and spleen (**c–d**) of busulfan-conditioned GD1 mice transplanted with HSPCs. Data include mice with low levels of edited allele engraftment (~1%, red dots), compared to untreated controls and other treated mice. These results demonstrate that even minimal engraftment of edited cells leads to a measurable reduction in substrate accumulation.
